# Supplementary material
Source: PubMed Central journal article supplement (PMC6533915)
Supplement: NIHMS1017589-supplement-1.pdf [file NIHMS1017589-supplement-1.pdf]

## Supplementary Data

### **Chemoprotective effects of dietary grape powder on ultraviolet B radiation-mediated skin carcinogenesis in SKH-1 hairless mice**

Chandra K. Singh\*<sup>1</sup>, Charlotte A. Mintie\*<sup>1</sup>, Mary A. Ndiaye<sup>1</sup>, Gagan Chhabra<sup>1</sup>, Panshak P. Dakup<sup>2</sup>, Ting Ye<sup>3</sup>, Menggang Yu<sup>4</sup>, Nihal Ahmad<sup>1,5</sup>

Affiliation of authors:

<sup>1</sup> Department of Dermatology, University of Wisconsin, Madison, Wisconsin, 53706, USA

<sup>2</sup> Department of Pharmaceutical Sciences, College of Pharmacy and Pharmaceutical Sciences, Washington State University, Spokane, WA, 99202, USA

<sup>3</sup> Department of Statistics, University of Wisconsin, Madison, Wisconsin 53706, USA

<sup>4</sup> Department of Biostatistics & Medical Informatics, University of Wisconsin, Madison, WI, 53792, USA

<sup>5</sup> William S. Middleton VA Medical Center, Madison, Wisconsin, 53705, USA

\*Contributed equally

Correspondence to:

Nihal Ahmad, Ph.D.,

Department of Dermatology, University of Wisconsin, Medical Sciences Center,  
1300 University Avenue, Madison, Wisconsin, 53706

Phone: (608) 263-2532; Fax: (608) 263-5223; E-mail: nahmad@wisc.edu

## **Materials and Methods**

### **Preparation of epidermal gDNA**

Skin from 5 randomly selected animals in the control and 5% GP groups were heated for 15 seconds at 60°C followed immediately by incubation for 30 seconds in ice water. Excess water was removed by placing tissue between two paper towels and the epidermis was gently separated from the remaining tissue, treated with Proteinase K and RNase A, and then genomic DNA (gDNA) was isolated using the QIAamp DNA Mini Kit (Qiagen) according to manufacturer's protocol.

### **Immuno-slot blot analysis**

The quality and quantity of gDNA samples were assessed using a NanoDrop 2000 spectrophotometer (Thermo Fisher Scientific) before measurement of photoproducts as previously reported (Gaddameedhi *et al.*, 2010b). Briefly, 200 ng and 300 ng of gDNA was used per slot for CPDs and (6-4) PPs detection, respectively. gDNA was denatured by heating for 10 minutes at 100°C, and neutralized immediately by placing on ice and adding cold ammonium acetate to a final 1 M concentration. Prepared gDNA samples were bound to a nitrocellulose membrane (pre-wet with 6x saline-sodium citrate (SSC) buffer) using a Bio-Dot SF slot-blot apparatus (BioRad Laboratories, Hercules, CA) and crosslinked by baking for 2 hours at 80°C in a vacuum oven (Shel Lab, Cornelius, OR). Blots were subsequently blocked in PBS-T and 5% nonfat dry milk for 1 hour at room temperature (RT). The membrane was incubated with anti-CPD or anti-(6-4) PP antibodies (see Supplementary Table S3) in ice-cold PBS-T for 12-16 hours at 4°C with gentle shaking. A secondary antibody (anti-mouse conjugated with HRP) was detected using Clarity Western ECL chemiluminescent substrate (#170-5061, Bio-Rad Laboratories) or SuperSignal West Femto (#34096, Thermo Fisher) reagents using Bio-Rad Imager. Afterward, the membrane was stained with SYBR gold (#S11494, 1:5000 dilution, Thermo Fisher) as an internal control, by incubating for 1 hour at RT under light protection. Signals were quantified using Adobe Photoshop CS6.

### **Tissue embedding and epidermal thickness evaluation**

Harvested tumors, adjacent (involved) skin, and non-UV treated (un-involved) stomach skin were formalin fixed, paraffin embedded, sectioned, and mounted on serial slides at the University of Wisconsin Carbone Cancer Center Experimental Pathology Core Laboratory. One slide from each mouse sample was stained with hematoxylin and eosin. Epidermal thicknesses were evaluated by analyzing 5 fields of view from each mouse section using an EVOS XL Core Cell Imaging System (Thermo Fisher Scientific) and measured using ImageJ software (NIH, Rockville, MD). Sections of measurement were obtained if the following criteria were present, 1) the hair follicle was in the correct orientation and 2) a basal layer was present. Sample measurements were averaged together, graphed and subjected to statistical analysis.

### **Tissue lysate preparation and immunoblot analysis**

Liquid nitrogen flash-frozen tumors were ground into powder using a mortar and pestle in liquid nitrogen before being divided for protein and RNA analysis. For protein analysis, the powdered tissue was lysed in 1X RIPA lysis buffer (Millipore, Billerica, MA) with freshly added PMSF (Amresco, Solon, OH) and protease inhibitor cocktail (Thermo Scientific, Waltham, MA). Protein concentration was determined by BCA Protein Assay (Thermo Scientific), and used for immunoblot analysis. Equal amounts of protein from 3 mice from each experimental group were pooled for subsequent studies, with 3 separate groupings made to represent averages of the entire cohort. These pooled protein samples were subjected to SDS-PAGE, transferred to a 0.2  $\mu$ m nitrocellulose membrane (Bio-Rad, Hercules, CA), and blocked with 5% non-fat dry milk in TBS-T. Membranes were probed with primary antibody (see Supplementary Table S3) and appropriate secondary antibody conjugated with horseradish peroxidase (HRP) (Cell Signaling Technology, Danvers, MA) before chemiluminescence detection using the Kodak ImageStation 4000MM (Carestream Health, Inc, Rochester, NY).

### **Reverse transcription and quantitative real-time PCR (RT-qPCR) analysis**

RNA was isolated from the tumor tissue powder (described above) was subjected to RNA isolation using the RNeasy Plus Mini Kit (Qiagen, Germantown, MD) according to manufacturer's protocol, followed by RNA quantification. Equal amounts of RNA from 3 mice from each experimental group were pooled for subsequent studies, with 3 separate groupings made to represent averages of the entire cohort. RNA was transcribed using random primers and M-MLV reverse transcriptase (Promega, Madison, WI). RT-qPCR was then performed with SYBR Premix Ex Taq II (TaKaRa, Mountain View, CA) and the appropriate primer set (see Supplementary Table S4). Relative target mRNA levels were calculated using the  $\Delta\Delta\text{CT}$  comparative method using *Gapdh* and *Actb* as endogenous controls.

### **Oxidative stress PCR array and Ingenuity Pathway Analysis (IPA)**

The effect of GP feeding on oxidative stress and antioxidant response genes was assessed using the Qiagen Mouse Oxidative Stress RT2 Profiler™ PCR Array (#PAMM-065Z) as per the manufacturer's instructions. Ct values for the genes were uploaded to the Qiagen GeneGlobe Data Analysis Center and analyzed using *Gapdh* and *Actb* reference genes. The data analysis web portal calculated fold-change using  $\Delta\Delta\text{CT}$  method (Supplementary Table S1 and S2), and also presented data as heat map (Supplementary Figure S2). In addition, selected genes from the PCR array results were validated using RT-qPCR analysis. Primers pairs detailed in Supplementary Table S4 were retrieved from Primer Bank (Wang *et al.*, 2012). Further, to understand the pathways controlled by GP supplementation, differentially expressed genes from the PCR array were analyzed using Qiagen's IPA software. The predicted gene-gene interaction and functional networks were generated and analyzed using the inputs of gene identifiers and fold-change regulation ( $\geq 1.75$ -fold change in 5% GP with statistical significance as well as with minimum 1.4-fold change in 3% GP).

### **Immunohistochemistry**

For immunostaining, slides were deparaffinized using xylenes and rehydrated via graded ethanol (100-70%). Using heat-induced epitope retrieval, slides were steamed for 45 minutes in IHC-Tek Epitope

Retrieval Solution (#IW-1100, IHC World, LLC, Ellicott City, MD), followed by a 20 minute RT incubation. Slides were immunostained using the Vectastain ABC Kit (#AK-5001, Vector Labs, Burlingame, CA) per manufacturer's protocol, with an overnight incubation at 4°C with primary antibody (see Supplementary Table S3) in a humidifying chamber. After a final wash, slides were exposed to Vector Red Alkaline Phosphatase Substrate Kit (#SK-5100, Vector Labs) until desired staining intensity was observed (approximately 5 minutes) then washed and counterstained with Harris modified hematoxylin (#SH30-500D, Fisher Scientific), dehydrated with graded ethanol (70-100%) and xylenes, then mounted with Permount mounting medium (Fisher Scientific) diluted in xylene (1:2). Images for Ki-67 and NRF2 were obtained at 20x using a Nuance Multispectral Tissue Imaging System (Perkin Elmer, Waltham, MA) and 4-HNE imaging was captured at 20x using an EVOS® XL Core Cell Imaging System (Thermo Fisher Scientific).

### **Caspase Glo 3/7 Assay**

Caspase-Glo 3/7 Assay (Promega) was used according to the manufacturer's protocol. Protein lysates from 5 tumors from each group (control and 5% GP) were prepared by grinding with mortar and pestle on liquid nitrogen, then resuspended in PBS + 1% NP40 with protease (Thermo Fisher) and phosphatase (CalBioChem, Millipore Sigma) inhibitors and sonicated on ice. Protein was quantified using a BCA Assay (Thermo Fisher), normalized to 100 µg/mL, and loaded with an equal volume of Caspase-Glo reagent. Luminescence was read using a Biotek Synergy H1 plate reader (Biotek, Winooski, VT).

**Immuno-slot blot: cyclobutane pyrimidine dimers (CPDs)**

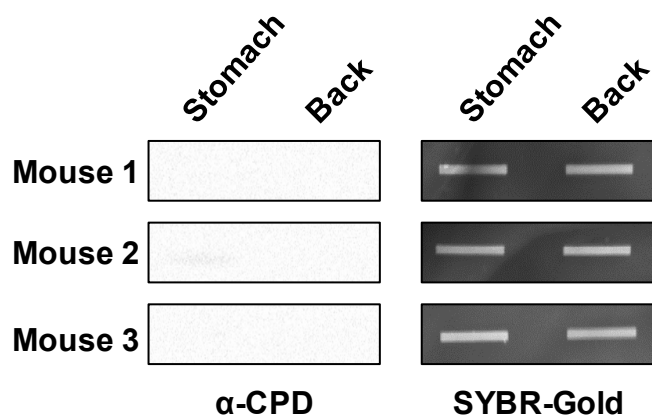

**Figure S1. Immuno-slot blot analysis for CPDs in normal skin samples from a separate cohort of untreated mice that had no UV exposure.** A separate cohort of 12 female retired breeder mice were aged to 36 weeks while on the control diet. At the termination of the experiment, mice were euthanized and tissues were collected for further analysis of DNA damage. Stomach and back skin from 3 representative animals is displayed above. SYBR gold, which stains total nucleic acid was used as an internal control. No CPDs were detected in normal skin samples.

a. Heat map of control vs. 3% GP

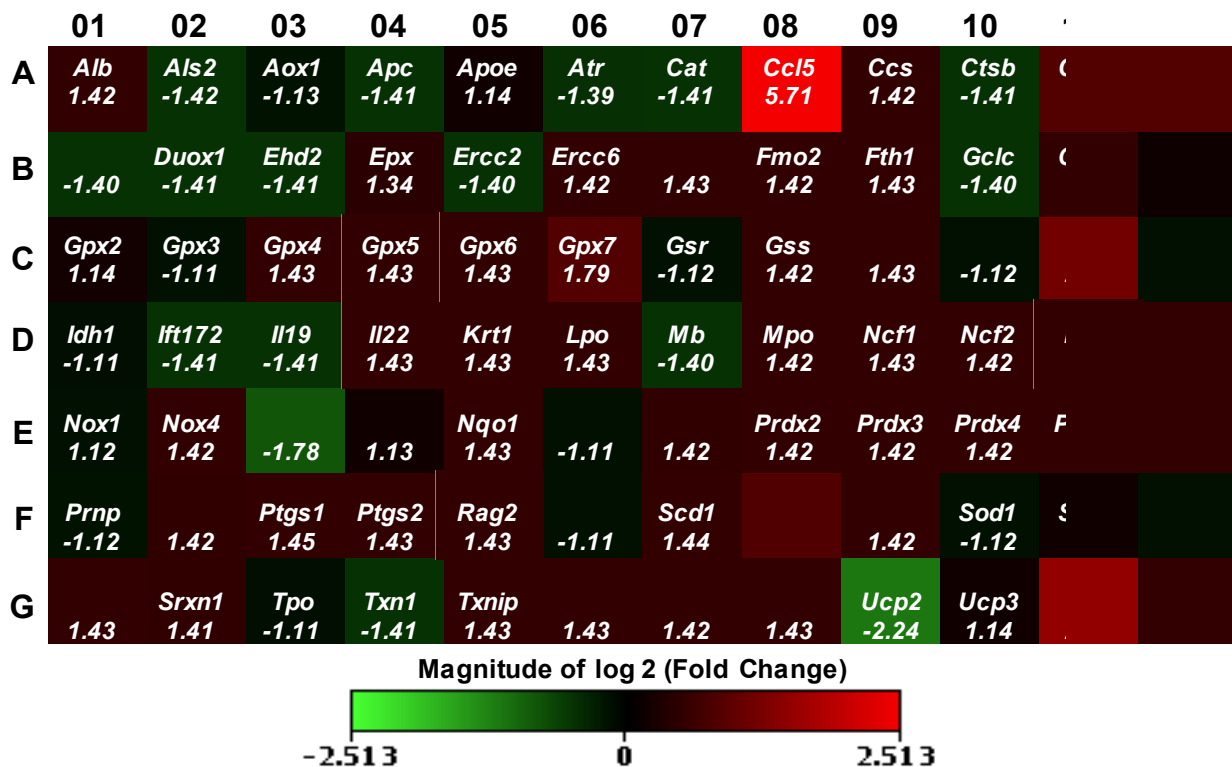

b. Heat map of control vs. 5% GP

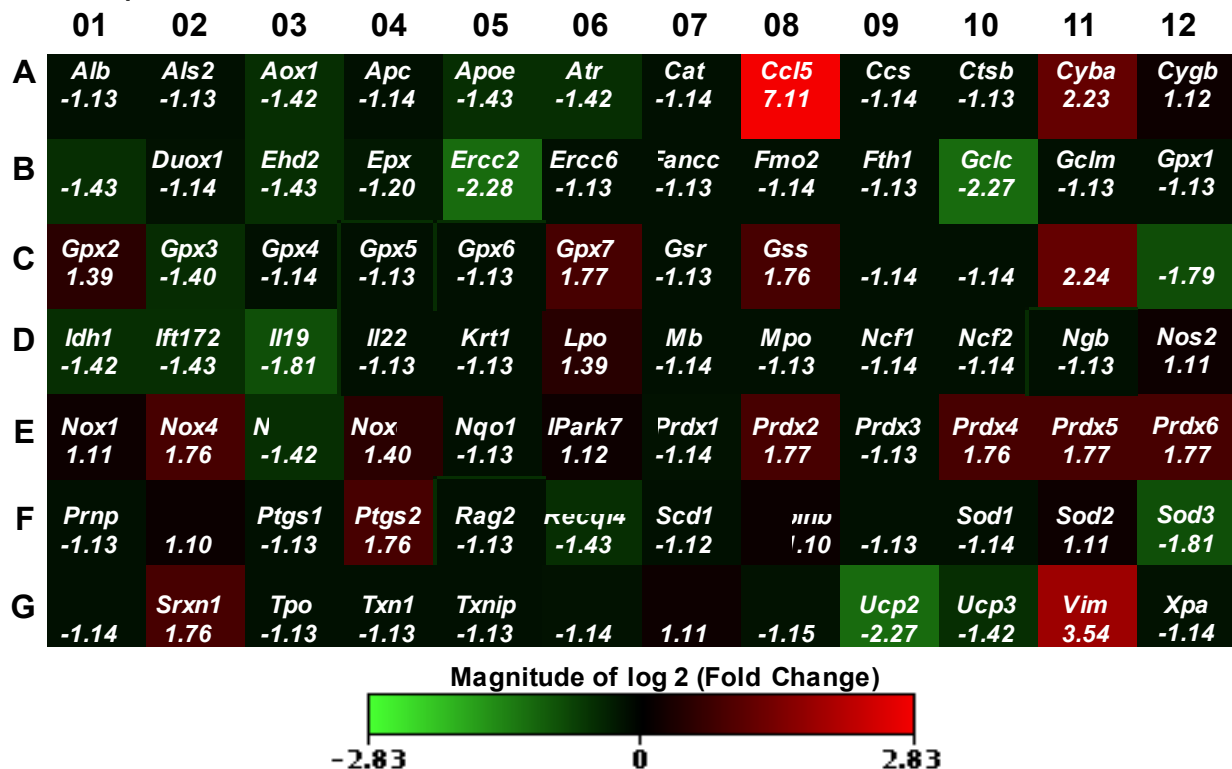

Figure S2. Effects of dietary grape on oxidative stress genes. Heat maps of control vs. 3% and 5% GP were generated to display gene fold changes. Upregulated genes are displayed in red and downregulated genes are shown in green, black boxes indicate no/negligible fold change in those particular genes.

**Table S1: List of key altered genes in response to grape powder (GP) treatments.** 18 genes were identified with  $\geq 1.75$ -fold change and statistical significance ( $P < 0.05$ ) in mouse samples treated with 5% GP. The data from 3% GP group has also been shown for comparative analysis. Genes showing  $\geq 1.75$ -fold change in 5% GP and  $\geq 1.4$ -fold in 3% GP, resulting total 16 genes were used for subsequent RT-qPCR validation and IPA analysis.

| Gene Symbol   | Gene Name                                     | Profiler Category                                  | 3% GP           |          | 5% GP           |          |
|---------------|-----------------------------------------------|----------------------------------------------------|-----------------|----------|-----------------|----------|
|               |                                               |                                                    | Fold Regulation | p-value  | Fold Regulation | p-value  |
| <i>Ccl5</i>   | Chemokine (C-C motif) ligand 5                | Oxidative Stress Responsive Gene                   | 5.71            | 0.014645 | 7.11            | 0.000002 |
| <i>Cyba</i>   | Cytochrome b-245, alpha polypeptide           | Superoxide Metabolism Gene                         | 1.8             | 0.091247 | 2.23            | 0.0004   |
| <i>Ercc2</i>  | Excision repair cross-complementation group 2 | Oxidative Stress Responsive Gene                   | -1.4            | 0.24914  | -2.28           | 0.010589 |
| <i>Gclc</i>   | Glutamate-cysteine ligase, catalytic subunit  | Oxidative Stress Responsive Gene                   | -1.4            | 0.247225 | -2.27           | 0.009965 |
| <i>Gpx7</i>   | Glutathione peroxidase 7                      | Oxidative Stress Responsive Gene                   | 1.79            | 0.003654 | 1.77            | 0.004132 |
| <i>Gss</i>    | Glutathione synthetase                        | Oxidative Stress Responsive Gene                   | 1.42            | 0.215394 | 1.76            | 0.004271 |
| <i>Hmox1</i>  | Heme oxygenase (decycling) 1                  | Oxidative Stress Responsive Gene                   | 2.27            | 0.000352 | 2.24            | 0.000424 |
| <i>Hspa1a</i> | Heat shock protein 1A                         | Oxidative Stress Responsive Gene                   | -1.11           | 0.773925 | -1.79           | 0.014468 |
| <i>Nox4</i>   | NADPH oxidase 4                               | Superoxide Metabolism Gene                         | 1.42            | 0.221724 | 1.76            | 0.004844 |
| <i>Prdx2</i>  | Peroxiredoxin 2                               | Oxidative Stress Responsive Gene/<br>Peroxiredoxin | 1.42            | 0.213154 | 1.77            | 0.004229 |
| <i>Prdx4</i>  | Peroxiredoxin 4                               | Peroxiredoxin (TPx)                                | 1.42            | 0.215395 | 1.76            | 0.004488 |
| <i>Prdx5</i>  | Peroxiredoxin 5                               | Peroxiredoxin (TPx)                                | 1.42            | 0.213666 | 1.77            | 0.004204 |
| <i>Prdx6</i>  | Peroxiredoxin 6                               | Peroxiredoxin (TPx)                                | 1.43            | 0.210228 | 1.77            | 0.003882 |
| <i>Ptgs2</i>  | Prostaglandin-endoperoxide synthase 2         | Peroxidase                                         | 1.43            | 0.210952 | 1.76            | 0.003908 |
| <i>Sod3</i>   | Superoxide dismutase 3, extracellular         | Antioxidant                                        | -1.12           | 0.7442   | -1.81           | 0.010659 |
| <i>Srxn1</i>  | Sulfiredoxin 1 homolog                        | Antioxidant                                        | 1.41            | 0.225001 | 1.76            | 0.005224 |
| <i>Ucp2</i>   | Uncoupling protein 2                          | Superoxide Metabolism Gene                         | -2.24           | 0.011074 | -2.27           | 0.01068  |
| <i>Vim</i>    | Vimentin                                      | Oxygen Transporter                                 | 2.85            | 0.032417 | 3.54            | 0.000045 |



**Table S2: Effect of grape powder treatments on 84 oxidative stress PCR array genes.**

| Gene         | Gene Description                                                                      | Profiler Category                                                     | 3% GP       |          | 5% GP       |          |
|--------------|---------------------------------------------------------------------------------------|-----------------------------------------------------------------------|-------------|----------|-------------|----------|
|              |                                                                                       |                                                                       | Fold Change | p-value  | Fold Change | p-value  |
| <i>Alb</i>   | Albumin                                                                               | Antioxidant                                                           | 1.42        | 0.218858 | -1.13       | 0.364246 |
| <i>Als2</i>  | Amyotrophic lateral sclerosis 2 (juvenile) homolog (human)                            | Oxidative Stress Responsive Gene                                      | -1.42       | 0.236393 | -1.13       | 0.360353 |
| <i>Aox1</i>  | Aldehyde oxidase 1                                                                    | Involved in Reactive Oxygen Species (ROS) Metabolism                  | -1.13       | 0.751417 | -1.42       | 0.592941 |
| <i>Apc</i>   | Adenomatosis polyposis coli                                                           | Antioxidant- Peroxidase                                               | -1.41       | 0.251594 | -1.14       | 0.363309 |
| <i>ApoE</i>  | Apolipoprotein E                                                                      | Oxidative Stress Responsive Gene                                      | 1.14        | 0.654409 | -1.43       | 0.172057 |
| <i>Atr</i>   | Ataxia telangiectasia and rad3 related                                                | Oxygen Tansporter                                                     | -1.39       | 0.386002 | -1.42       | 0.366689 |
| <i>Cat</i>   | Catalase                                                                              | Antioxidant- Peroxidase, Oxidative Stress Responsive Gene             | -1.41       | 0.240764 | -1.14       | 0.339531 |
| <i>Ccl5</i>  | Chemokine (C-C motif) ligand 5                                                        | Oxidative Stress Responsive Gene                                      | 5.71        | 0.014645 | 7.11        | 0.000002 |
| <i>Ccs</i>   | Copper chaperone for superoxide dismutase                                             | Involved in Superoxide Metabolism                                     | 1.42        | 0.215228 | -1.14       | 0.345722 |
| <i>Ctsb</i>  | Cathepsin B                                                                           | Antioxidant- Peroxidase, Oxidative Stress Responsive Gene             | -1.41       | 0.240381 | -1.13       | 0.354946 |
| <i>Cyba</i>  | Cytochrome b-245, alpha polypeptide                                                   | Involved in Superoxide Metabolism                                     | 1.8         | 0.091247 | 2.23        | 0.0004   |
| <i>Cygb</i>  | Cytoglobin                                                                            | Oxygen Tansporter                                                     | 1.8         | 0.08987  | 1.12        | 0.405717 |
| <i>Dnm2</i>  | Dynamin 2                                                                             | Oxygen Tansporter                                                     | -1.4        | 0.242862 | -1.43       | 0.220371 |
| <i>Duox1</i> | Dual oxidase 1                                                                        | Antioxidant- Peroxidase, Oxidative Stress Responsive Gene             | -1.41       | 0.243269 | -1.14       | 0.350213 |
| <i>Ehd2</i>  | EH-domain containing 2                                                                | Antioxidant- Peroxiredoxin                                            | -1.41       | 0.203231 | -1.43       | 0.190148 |
| <i>Epx</i>   | Eosinophil peroxidase                                                                 | Antioxidant- Peroxidase, Oxidative Stress Responsive Gene             | 1.34        | 0.273282 | -1.2        | 0.230678 |
| <i>Ercc2</i> | Excision repair cross-complementing rodent repair deficiency, complementation group 2 | Oxidative Stress Responsive Gene                                      | -1.4        | 0.24914  | -2.28       | 0.010589 |
| <i>Ercc6</i> | Excision repair cross-complementing rodent repair deficiency, complementation group 6 | Oxidative Stress Responsive Gene                                      | 1.42        | 0.213211 | -1.13       | 0.360697 |
| <i>Fancc</i> | Fanconi anemia, complementation group C                                               | Oxygen Tansporter                                                     | 1.43        | 0.21034  | -1.13       | 0.355737 |
| <i>Fmo2</i>  | Flavin containing monooxygenase 2                                                     | Involved in ROS Metabolism                                            | 1.42        | 0.212799 | -1.14       | 0.345907 |
| <i>Fth1</i>  | Ferritin heavy chain 1                                                                | Oxidative Stress Responsive Gene                                      | 1.43        | 0.210781 | -1.13       | 0.353059 |
| <i>Gclc</i>  | Glutamate-cysteine ligase, catalytic subunit                                          | Oxidative Stress Responsive Gene                                      | -1.4        | 0.247225 | -2.27       | 0.009965 |
| <i>Gclm</i>  | Glutamate-cysteine ligase, modifier subunit                                           | Oxidative Stress Responsive Gene                                      | 1.43        | 0.205741 | -1.13       | 0.345013 |
| <i>Gpx1</i>  | Glutathione peroxidase 1                                                              | Antioxidant- Glutathione Peroxidase, Oxidative Stress Responsive Gene | 1.11        | 0.634835 | -1.13       | 0.336807 |
| <i>Gpx2</i>  | Glutathione peroxidase 2                                                              | Antioxidant- Glutathione Peroxidase, Oxidative Stress Responsive Gene | 1.14        | 0.88457  | 1.39        | 0.469283 |
| <i>Gpx3</i>  | Glutathione peroxidase 3                                                              | Antioxidant- Glutathione Peroxidase, Oxidative Stress Responsive Gene | -1.11       | 0.380624 | -1.4        | 0.225606 |

Table S2 continued...

|               |                                                        |                                                                       |       |          |       |          |
|---------------|--------------------------------------------------------|-----------------------------------------------------------------------|-------|----------|-------|----------|
| <i>Gpx4</i>   | Glutathione peroxidase 4                               | Antioxidant- Glutathione Peroxidase, Oxidative Stress Responsive Gene | 1.43  | 0.212575 | -1.14 | 0.352836 |
| <i>Gpx5</i>   | Glutathione peroxidase 5                               | Antioxidant- Glutathione Peroxidase, Oxidative Stress Responsive Gene | 1.43  | 0.213375 | -1.13 | 0.356473 |
| <i>Gpx6</i>   | Glutathione peroxidase 6                               | Antioxidant- Glutathione Peroxidase, Oxidative Stress Responsive Gene | 1.43  | 0.213375 | -1.13 | 0.356473 |
| <i>Gpx7</i>   | Glutathione peroxidase 7                               | Antioxidant- Glutathione Peroxidase, Oxidative Stress Responsive Gene | 1.79  | 0.003654 | 1.77  | 0.004132 |
| <i>Gsr</i>    | Glutathione reductase                                  | Oxidative Stress Responsive Gene                                      | -1.12 | 0.397303 | -1.13 | 0.360304 |
| <i>Gss</i>    | Glutathione synthetase                                 | Oxidative Stress Responsive Gene                                      | 1.42  | 0.215394 | 1.76  | 0.004271 |
| <i>Gstk1</i>  | Glutathione S-transferase kappa 1                      | Antioxidant- Glutathione Peroxidase                                   | 1.43  | 0.212967 | -1.14 | 0.354319 |
| <i>Gstp1</i>  | Glutathione S-transferase, pi 1                        | Antioxidant- Glutathione Peroxidase                                   | -1.12 | 0.389275 | -1.14 | 0.349131 |
| <i>Hmxo1</i>  | Heme oxygenase (decycling) 1                           | Oxidative Stress Responsive Gene                                      | 2.27  | 0.000352 | 2.24  | 0.000424 |
| <i>Hspa1a</i> | Heat shock protein 1A                                  | Oxidative Stress Responsive Gene                                      | -1.11 | 0.773925 | -1.79 | 0.014468 |
| <i>Idh1</i>   | Isocitrate dehydrogenase 1 (NADP+), soluble            | Oxidative Stress Responsive Gene                                      | -1.11 | 0.807066 | -1.42 | 0.18914  |
| <i>Ifi172</i> | Intraflagellar transport 172 homolog (Chlamydomonas)   | Oxygen Transporter                                                    | -1.41 | 0.2433   | -1.43 | 0.21774  |
| <i>Il19</i>   | Interleukin 19                                         | Involved in ROS Metabolism                                            | -1.41 | 0.248498 | -1.81 | 0.083693 |
| <i>Il22</i>   | Interleukin 22                                         | Involved in ROS Metabolism                                            | 1.43  | 0.213375 | -1.13 | 0.356473 |
| <i>Krt1</i>   | Keratin 1                                              | Oxidative Stress Responsive Gene                                      | 1.43  | 0.211246 | -1.13 | 0.358458 |
| <i>Lpo</i>    | Lactoperoxidase                                        | Antioxidant- Peroxidase                                               | 1.43  | 0.210268 | 1.39  | 0.231326 |
| <i>Mb</i>     | Myoglobin                                              | Oxygen Transporter                                                    | -1.4  | 0.259115 | -1.14 | 0.359846 |
| <i>Mpo</i>    | Myeloperoxidase                                        | Antioxidant- Peroxidase, Oxidative Stress Responsive Gene             | 1.42  | 0.215271 | -1.13 | 0.356085 |
| <i>Ncf1</i>   | Neutrophil cytosolic factor 1                          | Involved in Superoxide Metabolism                                     | 1.43  | 0.212503 | -1.14 | 0.350568 |
| <i>Ncf2</i>   | Neutrophil cytosolic factor 2                          | Involved in Superoxide Metabolism                                     | 1.42  | 0.216312 | -1.14 | 0.351757 |
| <i>Ngb</i>    | Neuroglobin                                            | Oxygen Transporter                                                    | 1.43  | 0.213375 | -1.13 | 0.356473 |
| <i>Nos2</i>   | Nitric oxide synthase 2, inducible                     | Involved in Superoxide Metabolism                                     | 1.43  | 0.275414 | 1.11  | 0.406513 |
| <i>Nox1</i>   | NADPH oxidase 1                                        | Involved in Superoxide Metabolism                                     | -1.12 | 0.944014 | 1.11  | 0.633415 |
| <i>Nox4</i>   | NADPH oxidase 4                                        | Involved in Superoxide Metabolism                                     | 1.42  | 0.221724 | 1.76  | 0.004844 |
| <i>Noxal</i>  | NADPH oxidase activator 1                              | Involved in Superoxide Metabolism                                     | -1.78 | 0.132915 | -1.42 | 0.177651 |
| <i>Noxol</i>  | NADPH oxidase organizer 1                              | Involved in Superoxide Metabolism                                     | 1.13  | 0.67067  | 1.4   | 0.159773 |
| <i>Nqo1</i>   | NAD(P)H dehydrogenase, quinone 1                       | Oxidative Stress Responsive Gene                                      | 1.43  | 0.213773 | -1.13 | 0.372423 |
| <i>Park7</i>  | Parkinson disease (autosomal recessive, early onset) 7 | Oxidative Stress Responsive Gene                                      | -1.11 | 0.783525 | 1.12  | 0.399985 |
| <i>Prdx1</i>  | Peroxiredoxin 1                                        | Antioxidant- Peroxiredoxin, Oxidative Stress Responsive Gene          | 1.42  | 0.220131 | -1.14 | 0.33925  |
| <i>Prdx2</i>  | Peroxiredoxin 2                                        | Antioxidant- Peroxiredoxin, Oxidative Stress Responsive Gene          | 1.42  | 0.213154 | 1.77  | 0.004229 |
| <i>Prdx3</i>  | Peroxiredoxin 3                                        | Antioxidant- Peroxiredoxin                                            | 1.42  | 0.213458 | -1.13 | 0.354926 |
| <i>Prdx4</i>  | Peroxiredoxin 4                                        | Antioxidant- Peroxiredoxin                                            | 1.42  | 0.215395 | 1.76  | 0.004488 |

Table S2 continued...

|                       |                                                                 |                                                                 |       |          |       |          |
|-----------------------|-----------------------------------------------------------------|-----------------------------------------------------------------|-------|----------|-------|----------|
| <i>Prdx5</i>          | Peroxiredoxin 5                                                 | Antioxidant- Peroxiredoxin                                      | 1.42  | 0.213666 | 1.77  | 0.004204 |
| <i>Prdx6</i>          | Peroxiredoxin 6                                                 | Antioxidant- Peroxiredoxin,<br>Oxidative Stress Responsive Gene | 1.43  | 0.210228 | 1.77  | 0.003882 |
| <i>Prnp</i>           | Prion protein                                                   | Oxidative Stress Responsive Gene                                | -1.12 | 0.39609  | -1.13 | 0.370135 |
| <i>Psmb5</i>          | Proteasome (prosome, macropain)<br>subunit, beta type 5         | Oxidative Stress Responsive Gene                                | 1.42  | 0.219841 | 1.1   | 0.663179 |
| <i>Ptgs1</i>          | Prostaglandin-endoperoxide synthase<br>1                        | Antioxidant- Peroxidase                                         | 1.45  | 0.19953  | -1.13 | 0.363977 |
| <i>Ptgs2</i>          | Prostaglandin-endoperoxide synthase<br>2                        | Antioxidant- Peroxidase                                         | 1.43  | 0.210952 | 1.76  | 0.003908 |
| <i>Rag2</i>           | Recombination activating gene 2                                 | Antioxidant- Peroxidase                                         | 1.43  | 0.213375 | -1.13 | 0.356473 |
| <i>Recq14</i>         | RecQ protein-like 4                                             | Involved in Superoxide Metabolism                               | -1.11 | 0.771828 | -1.43 | 0.250213 |
| <i>Scd1</i>           | Stearoyl-Coenzyme A desaturase 1                                | Involved in Superoxide Metabolism                               | 1.44  | 0.203015 | -1.12 | 0.378903 |
| <i>Serpinb<br/>1b</i> | Serine (or cysteine) peptidase<br>inhibitor, clade B, member 1b | Antioxidant- Peroxidase                                         | 1.78  | 0.087398 | 1.1   | 0.433564 |
| <i>Slc38a1</i>        | Solute carrier family 38, member 1                              | Oxygen Tansporter                                               | 1.42  | 0.213153 | -1.13 | 0.353599 |
| <i>Sod1</i>           | Superoxide dismutase 1, soluble                                 | Involved in ROS Metabolism,<br>Oxidative Stress Responsive Gene | -1.12 | 0.390945 | -1.14 | 0.348373 |
| <i>Sod2</i>           | Superoxide dismutase 2,<br>mitochondrial                        | Involved in ROS Metabolism                                      | 1.13  | 0.335295 | 1.11  | 0.402898 |
| <i>Sod3</i>           | Superoxide dismutase 3, extracellular                           | Involved in ROS Metabolism                                      | -1.12 | 0.7442   | -1.81 | 0.010659 |
| <i>Sqstm1</i>         | Sequestosome 1                                                  | Oxidative Stress Responsive Gene                                | 1.43  | 0.210373 | -1.14 | 0.337401 |
| <i>Srxn1</i>          | Sulfiredoxin 1 homolog (S.<br>cerevisiae)                       | Antioxidant                                                     | 1.41  | 0.225001 | 1.76  | 0.005224 |
| <i>Tpo</i>            | Thyroid peroxidase                                              | Antioxidant- Peroxidase, Oxidative<br>Stress Responsive Gene    | -1.11 | 0.797561 | -1.13 | 0.722938 |
| <i>Txn1</i>           | Thioredoxin 1                                                   | Oxidative Stress Responsive Gene                                | -1.41 | 0.242038 | -1.13 | 0.333495 |
| <i>Txnip</i>          | Thioredoxin interacting protein                                 | Oxidative Stress Responsive Gene                                | 1.43  | 0.211889 | -1.13 | 0.353944 |
| <i>Txnrd1</i>         | Thioredoxin reductase 1                                         | Antioxidant, Oxidative Stress<br>Responsive Gene                | 1.43  | 0.2146   | -1.14 | 0.34279  |
| <i>Txnrd2</i>         | Thioredoxin reductase 2                                         | Antioxidant, Oxidative Stress<br>Responsive Gene                | 1.42  | 0.211071 | 1.11  | 0.646497 |
| <i>Txnrd3</i>         | Thioredoxin reductase 3                                         | Antioxidant                                                     | 1.43  | 0.213614 | -1.15 | 0.338762 |
| <i>Ucp2</i>           | Uncoupling protein 2 (mitochondrial,<br>proton carrier)         | Involved in Superoxide Metabolism                               | -2.24 | 0.011074 | -2.27 | 0.01068  |
| <i>Ucp3</i>           | Uncoupling protein 3 (mitochondrial,<br>proton carrier)         | Oxidative Stress Responsive Gene                                | 1.14  | 0.657215 | -1.42 | 0.179396 |
| <i>Vim</i>            | Vimentin                                                        | Oxygen Tansporter                                               | 2.85  | 0.032417 | 3.54  | 0.000045 |
| <i>Xpa</i>            | Xeroderma pigmentosum,<br>complementation group A               | Oxidative Stress Responsive Gene                                | 1.42  | 0.216064 | -1.14 | 0.349442 |

**Table S3: Antibodies used for western blotting (WB), immunohistochemistry (IHC), and/or slot blot (SB).**

| Gene Name         | Supplier       | Catalog Number | WB Dilution | IHC Dilution | SB Dilution | Molecular Weight (kDa) |
|-------------------|----------------|----------------|-------------|--------------|-------------|------------------------|
| PARP              | Cell Signaling | 9542           | 1:1000      |              |             | 116, 89                |
| Caspase-7         | Cell Signaling | 12827          | 1:1000      |              |             | 35, 20                 |
| NRF2              | Cell Signaling | 12721          | 1:1000      |              |             | 97-100                 |
| B-Actin           | Cell Signaling | 4970, 3700     | 1:1000      |              |             | 45                     |
| PCNA              | Santa Cruz     | Sc-56          | 1:500       |              |             | 36                     |
| BCL-2             | Santa Cruz     | Sc-7382        | 1:500       |              |             | 26                     |
| 4- Hydroxynonenal | Abcam          | Ab46545        | 1:2000      | 1:50         |             | n/a                    |
| Ki-67             | Cell Signaling | 12202          |             | 1:400        |             | n/a                    |
| NRF2              | Invitrogen     | PA5-27882      |             | 1:100        |             | n/a                    |
| CPD               | Cosmo Bio      | NM-DND-001     |             |              | 1:5000      | n/a                    |
| (6-4) PP          | Cosmo Bio      | NM-DND-002     |             |              | 1:3000      | n/a                    |

**Table S4: Primer sequences used for RT-qPCR validation.**

| <i>Gene</i>  | <b>Amplicon size (bp)</b> | <b>Orientation</b> | <b>Sequence (5'-3')</b> | <b>Length (bp)</b> | <b>T<sub>m</sub> (°C)</b> | <b>Primer Bank ID</b> |
|--------------|---------------------------|--------------------|-------------------------|--------------------|---------------------------|-----------------------|
| <i>Ccl5</i>  | 104                       | F                  | GCTGCTTTGCCTACCTCTCC    | 20                 | 62.6                      | 7305461a1             |
|              |                           | R                  | TCGAGTGACAAACACGACTGC   | 21                 | 62.8                      |                       |
| <i>Cyba</i>  | 127                       | F                  | TCACCAGGAATTACTACGTCCG  | 22                 | 61.2                      | 22094077a1            |
|              |                           | R                  | GCTGCCAGCAGATAGATCACA   | 21                 | 61.9                      |                       |
| <i>Ercc2</i> | 152                       | F                  | ACCCGGAGCAGTTCTCCTAC    | 20                 | 62.8                      | 31542614a1            |
|              |                           | R                  | GGTCACCTCCAGCGGATAAG    | 20                 | 61.7                      |                       |
| <i>Gclc</i>  | 125                       | F                  | GGGGTGACGAGGTGGAGTA     | 19                 | 62.3                      | 33468897a1            |
|              |                           | R                  | GTTGGGGTTTGTCTCTCCC     | 20                 | 62.1                      |                       |
| <i>Gpx7</i>  | 238                       | F                  | TCCGAGCAGGACTTCTACGAC   | 21                 | 63                        | 13195626a1            |
|              |                           | R                  | TCTCCCTGTTGGTGTCTGGTT   | 21                 | 62.8                      |                       |
| <i>Gss</i>   | 103                       | F                  | CAAAGCAGGCCATAGACAGGG   | 21                 | 62.8                      | 6680117a1             |
|              |                           | R                  | AAAAGCGTGAATGGGGCATAAC  | 21                 | 61.3                      |                       |
| <i>Hmox1</i> | 100                       | F                  | AAGCCGAGAATGCTGAGTTCA   | 21                 | 61.7                      | 6754212a1             |
|              |                           | R                  | GCCGTGTAGATATGGTACAAGGA | 23                 | 61.2                      |                       |
| <i>Nox4</i>  | 145                       | F                  | GAAGGGGTAAACACCTCTGC    | 21                 | 60.6                      | 7657389a1             |
|              |                           | R                  | ATGCTCTGCTTAAACACAATCCT | 23                 | 60.2                      |                       |
| <i>Prdx2</i> | 139                       | F                  | CACCTGGCGTGGATCAATACC   | 21                 | 62.8                      | 166235200c2           |
|              |                           | R                  | GACCCCTGTAAGCAATGCC     | 20                 | 62.9                      |                       |
| <i>Prdx4</i> | 101                       | F                  | CTCAAAGTACTGACTATCGTGG  | 23                 | 60.4                      | 7948999a1             |
|              |                           | R                  | CGATCCCCAAAAGCGATGATTC  | 23                 | 62.1                      |                       |
| <i>Prdx5</i> | 154                       | F                  | GGCTGTTCTAAGACCCACCTG   | 21                 | 62.1                      | 6755114a1             |
|              |                           | R                  | GGAGCCGAACCTTGCCTTC     | 19                 | 63                        |                       |
| <i>Prdx6</i> | 115                       | F                  | CGCCAGAGTTTGCCAAGAG     | 19                 | 61                        | 6671549a1             |
|              |                           | R                  | TCCGTGGGTGTTTACCATTG    | 21                 | 62.8                      |                       |
| <i>Ptgs2</i> | 74                        | F                  | TGAGCAACTATTCCAAACCAGC  | 22                 | 60.8                      | 31981525a1            |
|              |                           | R                  | GCACGTAGTCTTCGATCACTATC | 23                 | 60.3                      |                       |
| <i>Srxn1</i> | 113                       | F                  | ATCGTGGTGGTGGATTGATTC   | 21                 | 60.4                      | 467583a1              |
|              |                           | R                  | CACCCAGAGATAAGATTACCCA  | 23                 | 60.6                      |                       |
| <i>Ucp2</i>  | 109                       | F                  | ATGGTTGGTTTCAAGGCCACA   | 21                 | 62.5                      | 31543920a1            |
|              |                           | R                  | CGGTATCCAGAGGGAAAGTGAT  | 22                 | 61                        |                       |
| <i>Vim</i>   | 124                       | F                  | CGGCTGCGAGAGAAATTGC     | 19                 | 61.8                      | 31982755a1            |
|              |                           | R                  | CCACTTCCGTCAAGGTCAAG    | 22                 | 61.3                      |                       |
| <i>Ki-67</i> | 104                       | F                  | ATCATTGACCGCTCCTTTAGGT  | 22                 | 61.2                      | 1177528a1             |
|              |                           | R                  | GCTCGCCTTGATGGTTCCT     | 19                 | 62                        |                       |
| <i>Pcna</i>  | 135                       | F                  | TTTGAGGCACGCCTGATCC     | 19                 | 62.3                      | 7242171a1             |
|              |                           | R                  | GGAGACGTGAGACGAGTCCAT   | 21                 | 63                        |                       |
| <i>Gapdh</i> | 95                        | F                  | AGGTCGGTGTGAACGGATTTG   | 21                 | 62.6                      | 126012538c1           |
|              |                           | R                  | GGGGTCGTTGATGGCAACA     | 19                 | 62.6                      |                       |
| <i>Actb</i>  | 154                       | F                  | GGCTGTATTCCCCTCCATCG    | 20                 | 61.8                      | 6671509a1             |
|              |                           | R                  | CCAGTTGGTAACAATGCCATGT  | 22                 | 61.1                      |                       |
